# Supplementary material
Source: publisher figshare collection journal article supplement (https://asha.figshare.com/articles/dataset/_/13232354)
Supplement: Supplementary file 1 [file 1]

**Supplemental Table S4. Post-hoc (Bonferroni) tests** of ANOVAs comparing aphasia subtypes on factor scores derived from the structure matrix table. Significant differences ( $p < .05$ ) are shown in bold.

| Subtype Comparison | Grammatical Complexity |                 | Phrase Building |                 | Semantic Anomaly |                 | Grammatical Error |                 | Narrative Productivity |                 | Repair |                 |
|--------------------|------------------------|-----------------|-----------------|-----------------|------------------|-----------------|-------------------|-----------------|------------------------|-----------------|--------|-----------------|
|                    | diff                   | <i>p</i> -val   | diff            | <i>p</i> -val   | diff             | <i>p</i> -val   | diff              | <i>p</i> -val   | diff                   | <i>p</i> -val   | diff   | <i>p</i> -val   |
| ANO-BRO            | 0.91                   | <b>&lt;.001</b> | 1.15            | <b>&lt;.001</b> | -0.58            | <b>.001</b>     | -1.34             | <b>&lt;.001</b> | 0.82                   | <b>&lt;.001</b> | 0.58   | <b>&lt;.001</b> |
| ANO-CON            | -0.08                  | 1.000           | 0.14            | 1.000           | -0.26            | 1.000           | -0.44             | .051            | -0.43                  | <b>.025</b>     | 0.10   | 1.000           |
| ANO-NABW           | -0.64                  | <b>.005</b>     | -0.39           | .187            | 0.21             | 1.000           | 0.29              | 1.000           | -0.53                  | <b>.013</b>     | 0.58   | <b>.002</b>     |
| ANO-TCM            | 0.33                   | 1.000           | 0.79            | <b>.009</b>     | -0.19            | 1.000           | -0.65             | .166            | 0.84                   | <b>.005</b>     | 0.35   | 1.000           |
| ANO-WER            | -0.12                  | 1.000           | 0.08            | 1.000           | -1.08            | <b>&lt;.001</b> | -0.28             | 1.000           | -1.04                  | <b>&lt;.001</b> | 0.76   | <b>&lt;.001</b> |
| BRO-CON            | -0.99                  | <b>&lt;.001</b> | -1.01           | <b>&lt;.001</b> | 0.32             | 1.000           | 0.90              | <b>&lt;.001</b> | -1.25                  | <b>&lt;.001</b> | -0.48  | <b>.004</b>     |
| BRO-NABW           | -1.54                  | <b>&lt;.001</b> | -1.54           | <b>&lt;.001</b> | 0.79             | <b>.002</b>     | 1.63              | <b>&lt;.001</b> | -1.35                  | <b>&lt;.001</b> | 0.00   | 1.000           |
| BRO-TCM            | -0.57                  | .384            | -0.36           | 1.000           | 0.39             | 1.000           | 0.69              | .093            | 0.02                   | 1.000           | -0.23  | 1.000           |
| BRO-WER            | -1.03                  | <b>&lt;.001</b> | -1.07           | <b>&lt;.001</b> | -0.50            | .464            | 1.06              | <b>&lt;.001</b> | -1.86                  | <b>&lt;.001</b> | 0.17   | 1.000           |
| CON-NAB            | -0.55                  | .072            | -0.53           | <b>.038</b>     | 0.47             | .606            | 0.73              | <b>.003</b>     | -0.10                  | 1.000           | 0.49   | .065            |
| CON-TCM            | 0.41                   | 1.000           | 0.65            | .103            | 0.07             | 1.000           | -0.21             | 1.000           | 1.27                   | <b>&lt;.001</b> | 0.26   | 1.000           |
| CON-WER            | -0.04                  | 1.000           | -0.06           | 1.000           | -0.82            | <b>.020</b>     | 0.16              | 1.000           | -0.61                  | .028            | 0.66   | <b>.008</b>     |
| NABW-TCM           | 0.97                   | <b>.011</b>     | 1.18            | <b>&lt;.001</b> | -0.40            | 1.000           | -0.93             | <b>.015</b>     | 1.37                   | <b>&lt;.001</b> | -0.23  | 1.000           |
| NABW-WER           | 0.51                   | .438            | 0.47            | .382            | -1.29            | <b>&lt;.001</b> | -0.56             | .232            | -0.52                  | .221            | 0.17   | 1.000           |
| TCM-WER            | -0.46                  | 1.000           | -0.71           | .116            | -0.89            | .167            | 0.37              | 1.000           | -1.89                  | <b>&lt;.001</b> | 0.40   | 1.000           |

**ANO** = anomic aphasia; **BRO** = Broca's aphasia; **CON** = conduction aphasia; **WER** = Wernicke's aphasia; **TCM** = transcortical motor aphasia; **NABW** = not aphasic by WAB.
