# Supplementary material
Source: publisher figshare collection journal article supplement (https://asha.figshare.com/articles/dataset/_/13232354)
Supplement: Supplementary file 2 [file 1]

**Supplemental Figure S3. Latent profile pie charts.** For each identified latent profile, the numbers of speakers with each aphasia subtype are shown.

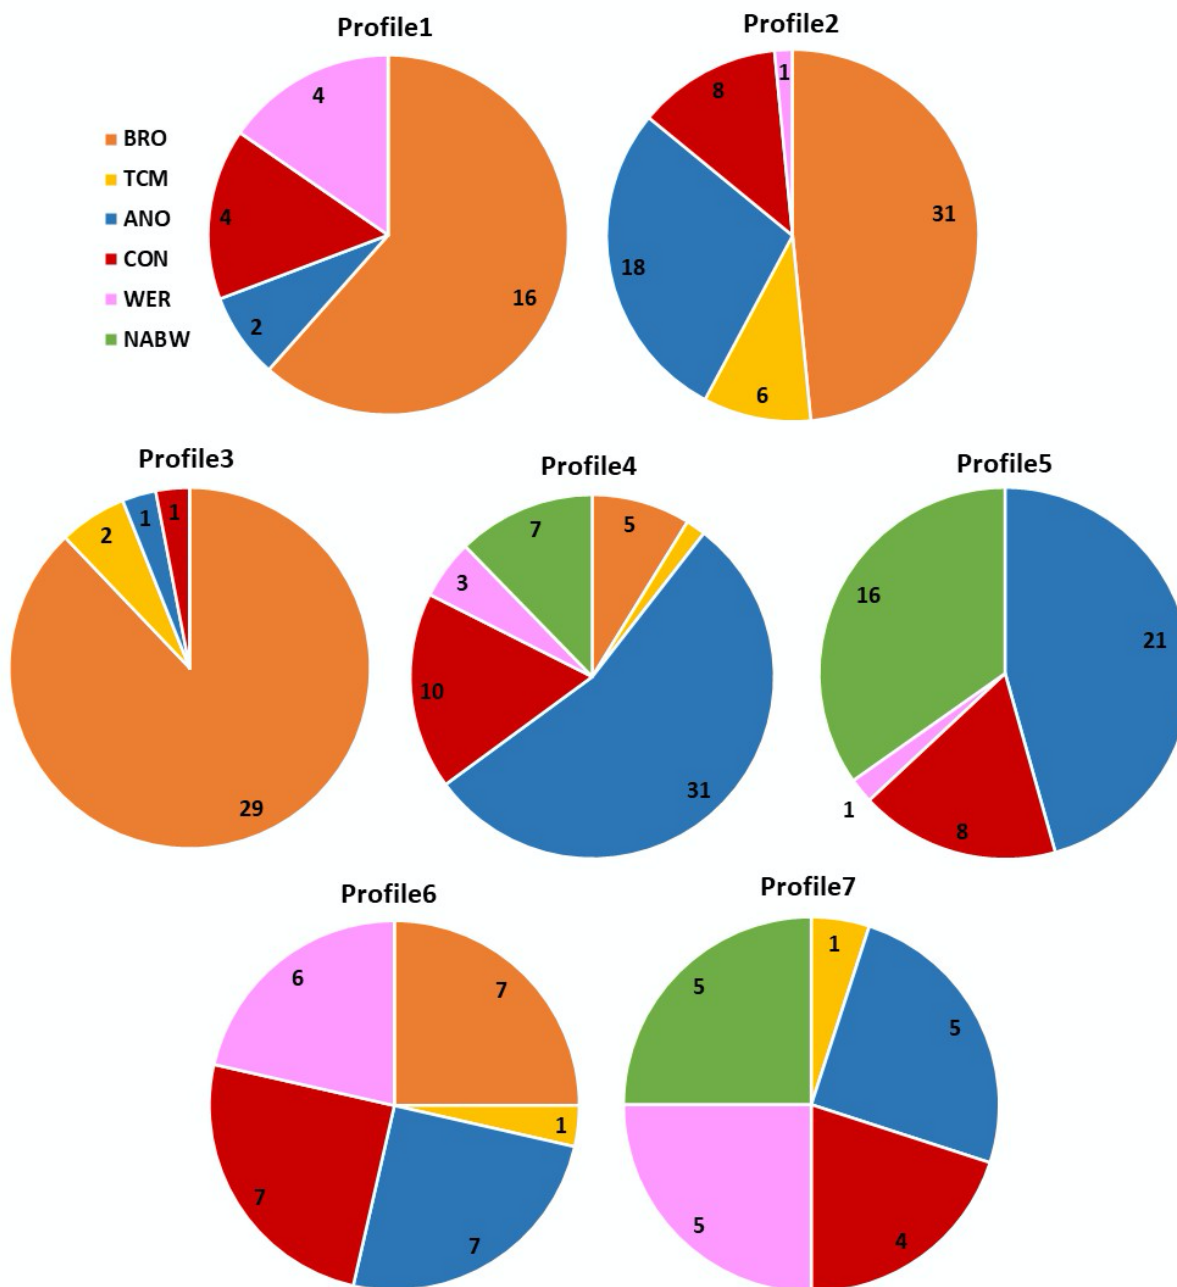

**ANO** = anomic aphasia; **BRO** = Broca's aphasia; **CON** = conduction aphasia; **WER** = Wernicke's aphasia; **TCM** = transcortical motor aphasia; **NABW** = not aphasic by WAB.
