# Supplementary material
Source: publisher figshare collection journal article supplement (https://asha.figshare.com/articles/dataset/_/13232354)
Supplement: Supplementary file 3 [file 1]

**Supplemental Figure S1. Intercorrelations among spontaneous speech measures.** Measures are arranged in order of similarity. Blue shading represents positive correlations; red shading represents negative correlations.

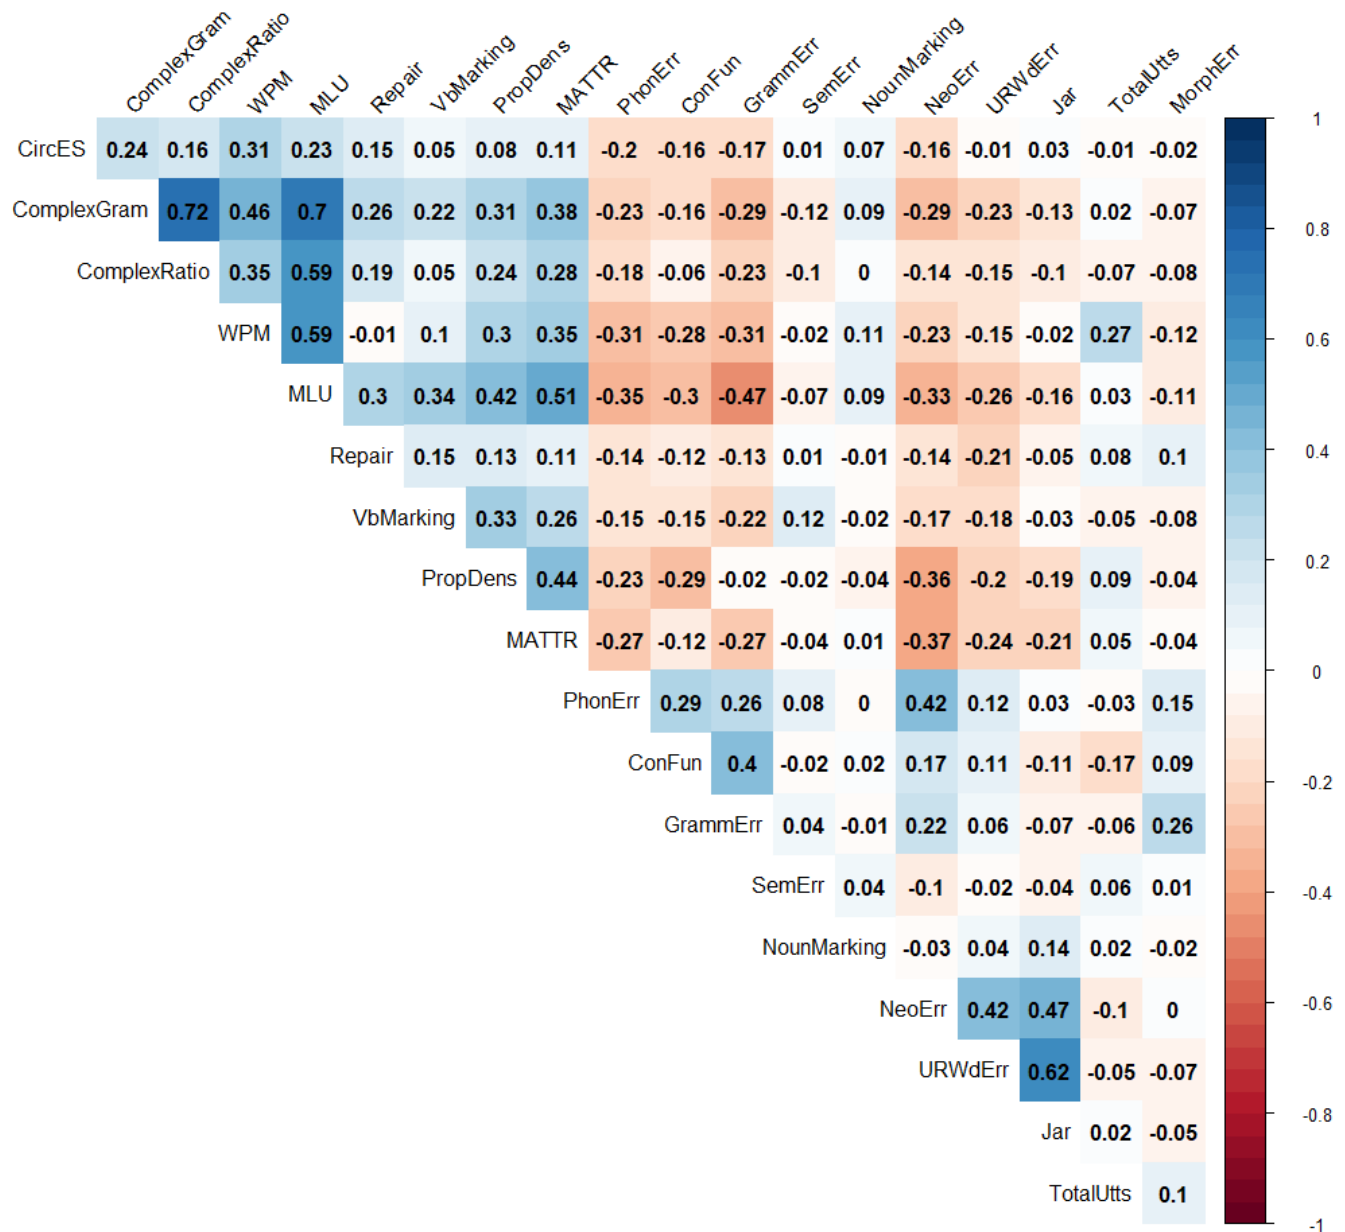

**CircEs** = % utterances with circumlocution or empty speech; **ComplexGram** = % grammatically complex utterances; **ComplexRatio** = % grammatically complex sentences; **WPM** = speech rate in words per minute; **MLU** = mean length of utterances in words; **Repair** = % utterances with repetition or retracing; **VbMarking** = % verbs inflected; **PropDens** = propositional density; **MATTR** = moving average type-token ratio; **PhonErr** = % phonologically related words of total words; **ConFun** = content:function word ratio; **GrammErr** = % utterances containing grammatical errors; **SemErr** = % semantically related words of total words; **NounMarking** = % nouns inflected; **NeoErr** = % neologistic errors of total words; **URWdErr** = % unrelated word errors of total words; **Jar** = % utterances containing jargon; **TotalUtts** = number of total utterances; **MorphErr** = % utterances with morphological errors.
