# Supplementary material
Source: publisher figshare collection journal article supplement (https://asha.figshare.com/articles/dataset/_/13232354)
Supplement: Supplementary file 4 [file 1]

**Supplemental Table S2. Factor pattern matrix loadings.** Loadings > .4 are shown in bold.

| Variable                                                                       | Factor1<br>Gram<br>Comp | Factor2<br>Phrase<br>Bldg | Factor3<br>Sem<br>Anom | Factor4<br>Gram<br>Err | Factor5<br>Narr<br>Prod | Factor6<br>Repair | h2   | com |
|--------------------------------------------------------------------------------|-------------------------|---------------------------|------------------------|------------------------|-------------------------|-------------------|------|-----|
| Total Utts                                                                     | -0.16                   | -0.05                     | -0.02                  | 0.04                   | <b>0.47</b>             | 0.01              | 0.83 | 1.3 |
| WPM                                                                            | 0.29                    | -0.01                     | -0.01                  | 0.05                   | <b>0.91</b>             | <b>-0.43</b>      | 0.01 | 1.6 |
| MLU                                                                            | <b>0.55</b>             | 0.25                      | -0.06                  | -0.14                  | 0.11                    | 0.05              | 0.23 | 1.7 |
| Prop Dens                                                                      | 0.02                    | <b>0.94</b>               | 0.02                   | 0.37                   | -0.01                   | -0.09             | 0.42 | 1.3 |
| Con:Fun                                                                        | 0.15                    | -0.26                     | -0.10                  | 0.26                   | -0.20                   | -0.12             | 0.68 | 4.3 |
| Repair                                                                         | 0.20                    | 0.03                      | -0.01                  | 0.01                   | -0.07                   | <b>0.59</b>       | 0.63 | 1.3 |
| Morph Err                                                                      | -0.03                   | -0.04                     | -0.03                  | 0.31                   | 0.08                    | 0.22              | 0.86 | 2.1 |
| Neo Err                                                                        | 0.07                    | -0.30                     | <b>0.46</b>            | 0.09                   | -0.04                   | -0.05             | 0.55 | 1.9 |
| Phon Err                                                                       | -0.01                   | -0.31                     | -0.01                  | 0.06                   | -0.17                   | -0.05             | 0.77 | 1.7 |
| UR Wd Err                                                                      | -0.02                   | 0.01                      | <b>0.64</b>            | 0.00                   | -0.07                   | -0.13             | 0.51 | 1.1 |
| MATTR                                                                          | 0.15                    | <b>0.52</b>               | -0.11                  | -0.03                  | -0.02                   | -0.10             | 0.59 | 1.3 |
| Circ/ES                                                                        | 0.16                    | -0.06                     | 0.04                   | -0.02                  | 0.29                    | 0.06              | 0.86 | 1.8 |
| Gramm Err                                                                      | -0.02                   | 0.30                      | 0.10                   | <b>1.14</b>            | 0.02                    | -0.06             | 0.01 | 1.2 |
| Jargon                                                                         | 0.01                    | 0.13                      | <b>1.06</b>            | 0.03                   | 0.11                    | 0.13              | 0.01 | 1.1 |
| Embedding                                                                      | <b>0.85</b>             | 0.06                      | 0.01                   | 0.03                   | -0.03                   | 0.19              | 0.23 | 1.1 |
| Verb Marking                                                                   | -0.04                   | <b>0.55</b>               | 0.06                   | -0.05                  | -0.14                   | 0.09              | 0.74 | 1.2 |
| Complex Ratio                                                                  | <b>0.93</b>             | -0.08                     | 0.03                   | 0.00                   | -0.15                   | 0.12              | 0.29 | 1.1 |
| <b>Importance of factors</b> (sum of squared loadings; variance accounted for) |                         |                           |                        |                        |                         |                   |      |     |
| SS loadings                                                                    | 2.21                    | 1.65                      | 1.75                   | 1.36                   | 1.21                    | 0.61              |      |     |
| Proportion Var                                                                 | 0.13                    | 0.10                      | 0.10                   | 0.08                   | 0.07                    | 0.04              |      |     |
| Cumulative Var                                                                 | 0.13                    | 0.23                      | 0.33                   | 0.41                   | 0.48                    | 0.52              |      |     |

**Notes:**

- The pattern matrix table shows regression coefficients which, in the case of oblique rotations, are not equivalent to correlations and, therefore, are not constrained to be less than 1.
- Please see Supplementary Table S1 for variable acronyms.
- **Gram Comp** = Grammatical Complexity; **Phrase Bldg** = Phrase Building; **Sem Anom** = Semantic Anomaly; **Gram Err** = Grammatical Errors; **Narr Prod** = Narrative Productivity; **Repair** = Repair.
- **h2** = communalities; **com** = variable complexity (degree of cross-loading).
