# Supplementary material
Source: publisher figshare collection journal article supplement (https://asha.figshare.com/articles/dataset/_/13232354)

**Supplemental Figure S2. Parallel analysis.** Blue triangles indicate eigen-values for the factor analysis when 17 factors were included (one for each variable). The red dotted line represents randomly generated data, simulated or resampled from the dataset. Six of the actual eigenvalues fall above this line and were therefore retained.

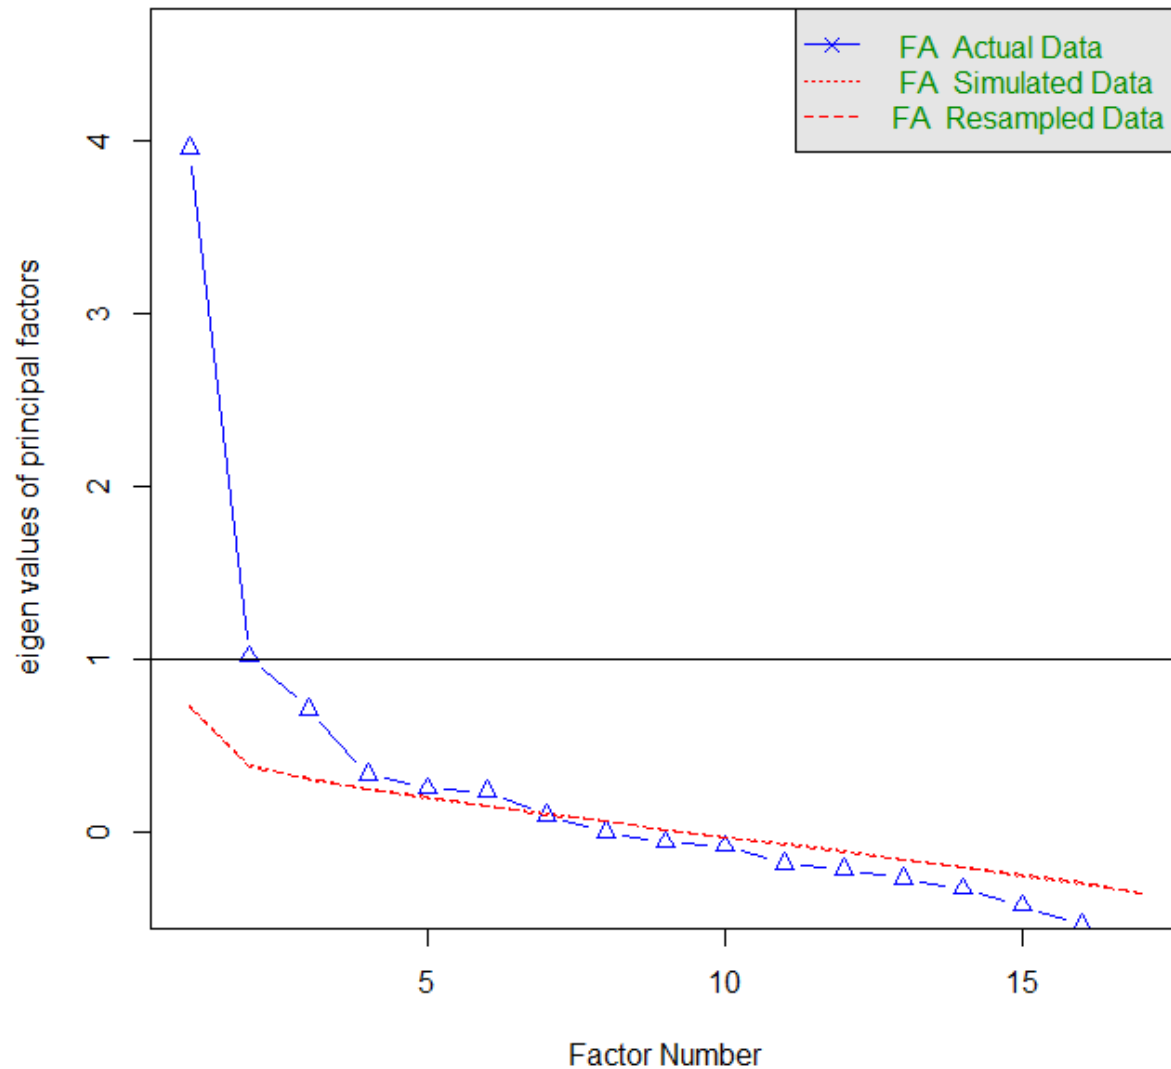

Supplement: Supplementary file 5 [file 1]
