# Supplementary material
Source: publisher figshare collection journal article supplement (https://asha.figshare.com/articles/dataset/_/13232354)
Supplement: Supplementary file 6 [file 1]

**Supplemental Table S3. Factor structure matrix loadings.** Loadings > .4 are shown in bold.

| Variable      | Gram Comp   | Phrase Bldg  | Sem Anom    | Gram Err     | Narr Prod    | Repair      |
|---------------|-------------|--------------|-------------|--------------|--------------|-------------|
| Total Utts    | -0.02       | 0.10         | -0.04       | -0.08        | 0.37         | 0.14        |
| WPM           | <b>0.59</b> | <b>0.47</b>  | -0.15       | -0.39        | <b>0.86</b>  | -0.14       |
| MLU           | <b>0.79</b> | <b>0.69</b>  | -0.32       | <b>-0.55</b> | <b>0.53</b>  | 0.20        |
| Prop Dens     | 0.33        | <b>0.70</b>  | -0.31       | -0.16        | 0.29         | 0.10        |
| Con:Fun       | -0.13       | <b>-0.44</b> | 0.02        | <b>0.46</b>  | <b>-0.41</b> | -0.26       |
| Repair        | 0.20        | 0.25         | -0.17       | -0.14        | 0.20         | <b>0.58</b> |
| Morph Err     | -0.12       | -0.12        | -0.06       | 0.28         | -0.02        | 0.20        |
| Neo Err       | -0.24       | <b>-0.52</b> | <b>0.57</b> | 0.27         | -0.31        | -0.25       |
| Phon Err      | -0.25       | <b>-0.45</b> | 0.14        | 0.33         | -0.38        | -0.19       |
| UR Wd Err     | -0.20       | -0.31        | <b>0.68</b> | 0.06         | -0.23        | -0.28       |
| MATTR         | <b>0.43</b> | <b>0.61</b>  | -0.31       | -0.36        | 0.30         | 0.07        |
| Circ/ES       | 0.24        | 0.19         | -0.05       | -0.19        | 0.34         | 0.14        |
| Gramm Err     | -0.33       | <b>-0.41</b> | 0.02        | <b>0.97</b>  | -0.37        | -0.15       |
| Jargon        | -0.15       | -0.17        | <b>0.96</b> | -0.11        | 0.03         | -0.02       |
| Embedding     | <b>0.86</b> | <b>0.49</b>  | -0.25       | -0.34        | 0.35         | 0.21        |
| Verb Marking  | 0.18        | <b>0.48</b>  | -0.12       | -0.30        | 0.16         | 0.18        |
| Complex Ratio | <b>0.82</b> | 0.31         | -0.17       | -0.25        | 0.18         | 0.07        |

**Importance of factors** (sum of squared loadings; variance accounted for)

|                |      |      |      |      |      |      |
|----------------|------|------|------|------|------|------|
| SS loadings    | 3.12 | 3.19 | 2.20 | 2.37 | 2.27 | 0.84 |
| Proportion Var | 0.18 | 0.19 | 0.13 | 0.14 | 0.13 | 0.05 |

**Factor score intercorrelations**

|             |  |      |       |       |       |       |
|-------------|--|------|-------|-------|-------|-------|
| Gram Comp   |  | 0.49 | -0.25 | -0.39 | 0.37  | 0.03  |
| Phrase Bldg |  |      | -0.37 | -0.58 | 0.52  | 0.27  |
| Sem Anom    |  |      |       | 0.02  | -0.18 | -0.20 |
| Gram Err    |  |      |       |       | -0.44 | -0.13 |
| Narr Prod   |  |      |       |       |       | 0.31  |

▪ *Notes:*

- Cumulative variance accounted for is not shown in this table, as the proportions of variance accounted for by each factor overlap with each other, and therefore cannot be summed.
- **Gram Comp** = Grammatical Complexity; **Phrase Bldg** = Phrase Building; **Sem Anom** = Semantic Anomaly; **Gram Err** = Grammatical Errors; **Narr Prod** = Narrative Productivity; **Repair** = Repair.
