# Supplementary material
Source: publisher figshare collection journal article supplement (https://asha.figshare.com/articles/dataset/_/13232354)
Supplement: Supplementary file 7 [file 1]

**Supplemental Table S1. Spontaneous speech variables for each aphasia subtype.**

| Variable      | ANO ( <i>n</i> = 85) |           | BRO ( <i>n</i> = 88) |           | CON ( <i>n</i> = 42) |           | WER ( <i>n</i> = 20) |           | TCM ( <i>n</i> = 11) |           | NABW ( <i>n</i> = 28) |           |
|---------------|----------------------|-----------|----------------------|-----------|----------------------|-----------|----------------------|-----------|----------------------|-----------|-----------------------|-----------|
|               | <i>M</i>             | <i>SD</i> | <i>M</i>              | <i>SD</i> |
| Total Utts    | 0.082                | 1.154     | -0.177               | 0.940     | 0.234                | 0.898     | 0.439                | 1.172     | -0.607               | 0.494     | -0.118                | 0.564     |
| WPM           | -0.017               | 0.735     | -0.701               | 0.526     | 0.469                | 0.888     | 1.309                | 1.477     | -0.692               | 0.379     | 0.887                 | 0.727     |
| MLU           | 0.434                | 0.762     | -0.927               | 0.663     | 0.314                | 0.772     | 0.275                | 0.859     | -0.441               | 0.496     | 1.102                 | 0.655     |
| Complex Gram  | 0.160                | 0.518     | -0.372               | 1.443     | 0.127                | 0.655     | 0.260                | 0.551     | -0.332               | 1.422     | 0.441                 | 0.313     |
| Complex Ratio | -0.158               | 0.235     | 0.423                | 1.663     | -0.290               | 0.209     | -0.278               | 0.192     | -0.043               | 0.242     | -0.200                | 0.148     |
| Noun Marking  | 0.349                | 0.891     | -0.362               | 1.032     | 0.438                | 0.885     | -0.457               | 0.870     | -0.096               | 1.058     | -0.215                | 0.874     |
| Verb Marking  | -0.016               | 0.833     | 0.077                | 1.260     | 0.299                | 1.153     | -0.259               | 0.400     | -0.206               | 0.584     | -0.373                | 0.451     |
| Gramm Err     | -0.259               | 0.369     | 0.392                | 1.542     | -0.032               | 0.641     | 0.008                | 0.602     | -0.006               | 0.844     | -0.404                | 0.040     |
| Morph Err     | -0.188               | 0.626     | 0.420                | 1.457     | -0.156               | 0.455     | -0.280               | 0.403     | 0.325                | 1.235     | -0.440                | 0.177     |
| Con:Fun       | -0.080               | 0.696     | 0.041                | 1.127     | 0.107                | 0.821     | 0.603                | 2.020     | -0.214               | 0.512     | -0.393                | 0.167     |
| Repair        | -0.232               | 0.465     | 0.262                | 1.374     | -0.052               | 0.796     | 0.495                | 1.291     | 0.000                | 1.126     | -0.393                | 0.108     |
| Prop Dens     | 0.332                | 0.489     | -0.622               | 1.317     | 0.277                | 0.593     | 0.204                | 0.579     | -0.565               | 1.329     | 0.606                 | 0.295     |
| MATTR         | 0.126                | 1.094     | -0.364               | 0.644     | 0.349                | 0.908     | 1.087                | 1.509     | -0.208               | 0.805     | -0.455                | 0.428     |
| Circ/ES       | -0.525               | 0.634     | 0.758                | 1.107     | -0.023               | 0.775     | -0.053               | 0.488     | 0.007                | 0.932     | -0.718                | 0.480     |
| Jargon        | -0.214               | 0.590     | 0.104                | 1.071     | 0.093                | 1.062     | 0.956                | 1.878     | -0.250               | 0.415     | -0.400                | 0.090     |
| Neo Err       | 0.247                | 0.990     | -0.595               | 0.883     | 0.311                | 0.922     | 0.112                | 1.034     | -0.116               | 0.740     | 0.619                 | 0.626     |
| Phon Err      | 0.021                | 0.905     | -0.123               | 1.261     | 0.069                | 0.691     | 0.611                | 1.010     | -0.281               | 0.790     | -0.105                | 0.625     |
| Sem Err       | 0.247                | 0.830     | -0.444               | 1.251     | 0.078                | 0.794     | 0.161                | 0.695     | 0.006                | 0.869     | 0.411                 | 0.558     |
| UR Wd Err     | 0.133                | 1.137     | -0.461               | 0.529     | 0.171                | 0.848     | 0.117                | 0.966     | 0.347                | 2.065     | 0.570                 | 0.822     |

- **ANO** = anomic aphasia; **BRO** = Broca's aphasia; **CON** = conduction aphasia; **WER** = Wernicke's aphasia; **TCM** = transcortical motor aphasia; **NABW** = not aphasic by WAB.
- **Total Utts** = # total utterances; **WPM** = speech rate in words per minute; **MLU** = mean length of utterances in words; **Complex Gram** = % grammatically complex utterances; **Complex Ratio** = % grammatically complex sentences; **Noun Marking** = % nouns inflected; **Verb Marking** = % verbs inflected; **Gramm Err** = % utterances with grammatical errors; **Morph Err** = % utterances with morphological errors; **Con:Fun** = content:function word ratio; **Repair** = % utterances with repetition or retracing; **Prop Dens** = propositional density; **MATTR** = moving average type-token ratio; **Circ/Es** = % utterances with circumlocution or empty speech; **Jar** = % utterances containing jargon; **Neo Err** = % neologistic errors of total words; **Phon Err** = % phonologically related words of total words; **Sem Err** = % semantically related words of total words; **UR Wd Err** = % unrelated word errors of total words.
